# Supplementary material
Source: ML conference proceedings conference paper supplement (https://openreview.net/forum?id=xJrzLYT2YL7)

# Scene: burning wood

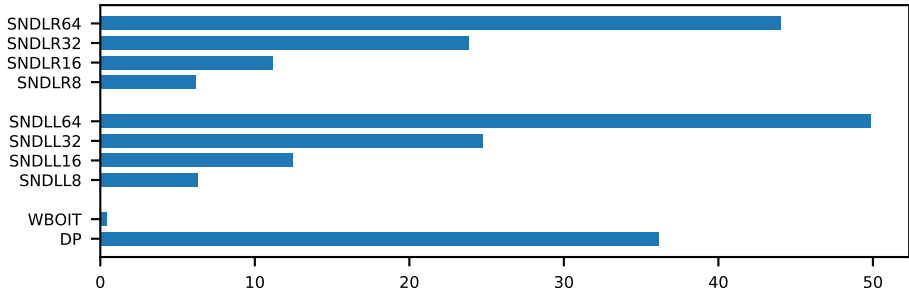

Supplement: supplementary_material [file attachment]

Scene: colored smoke

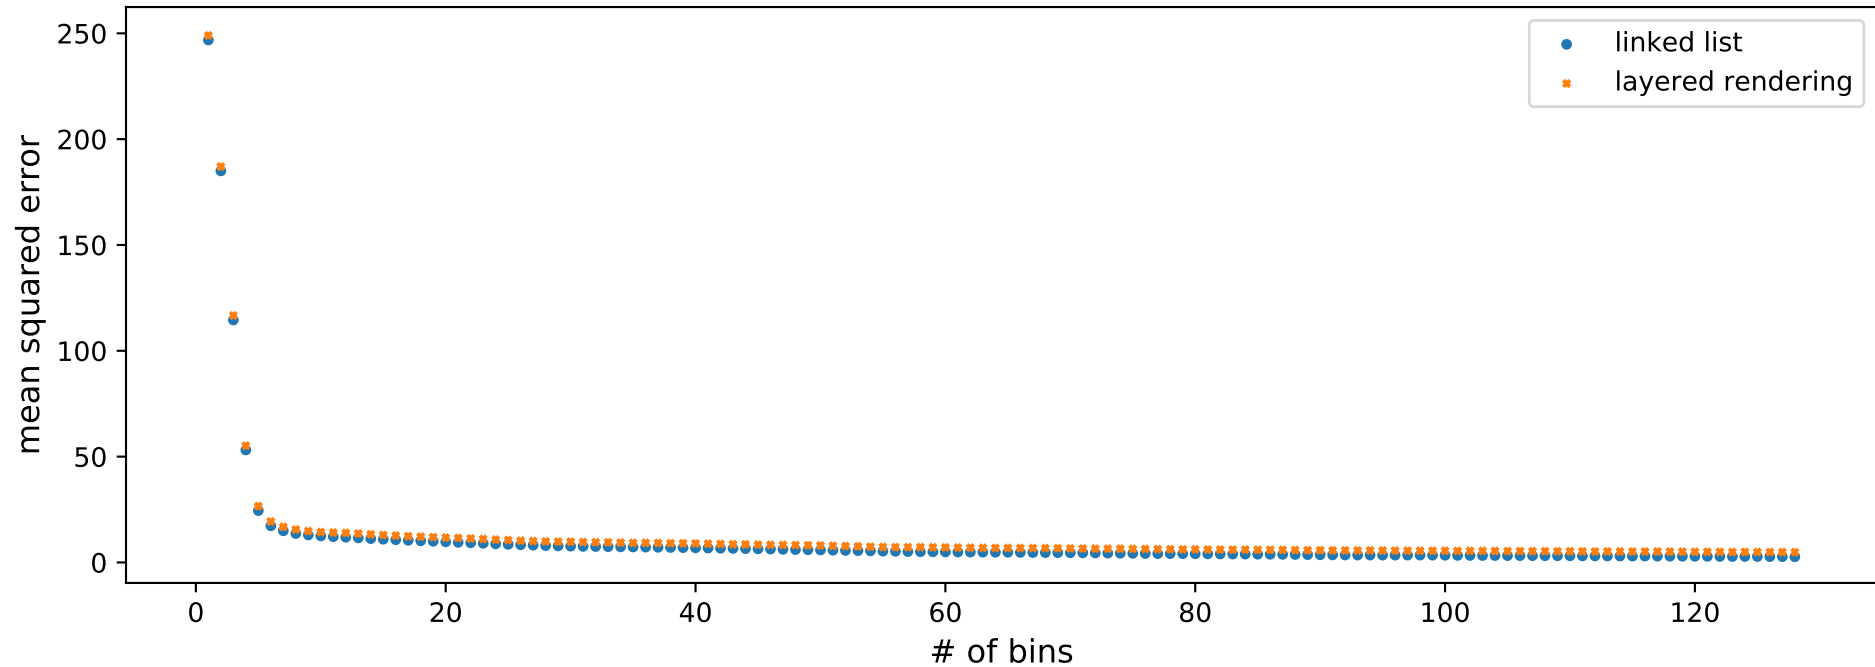

Supplement: supplementary_material [file attachment]

Scene: colored smoke

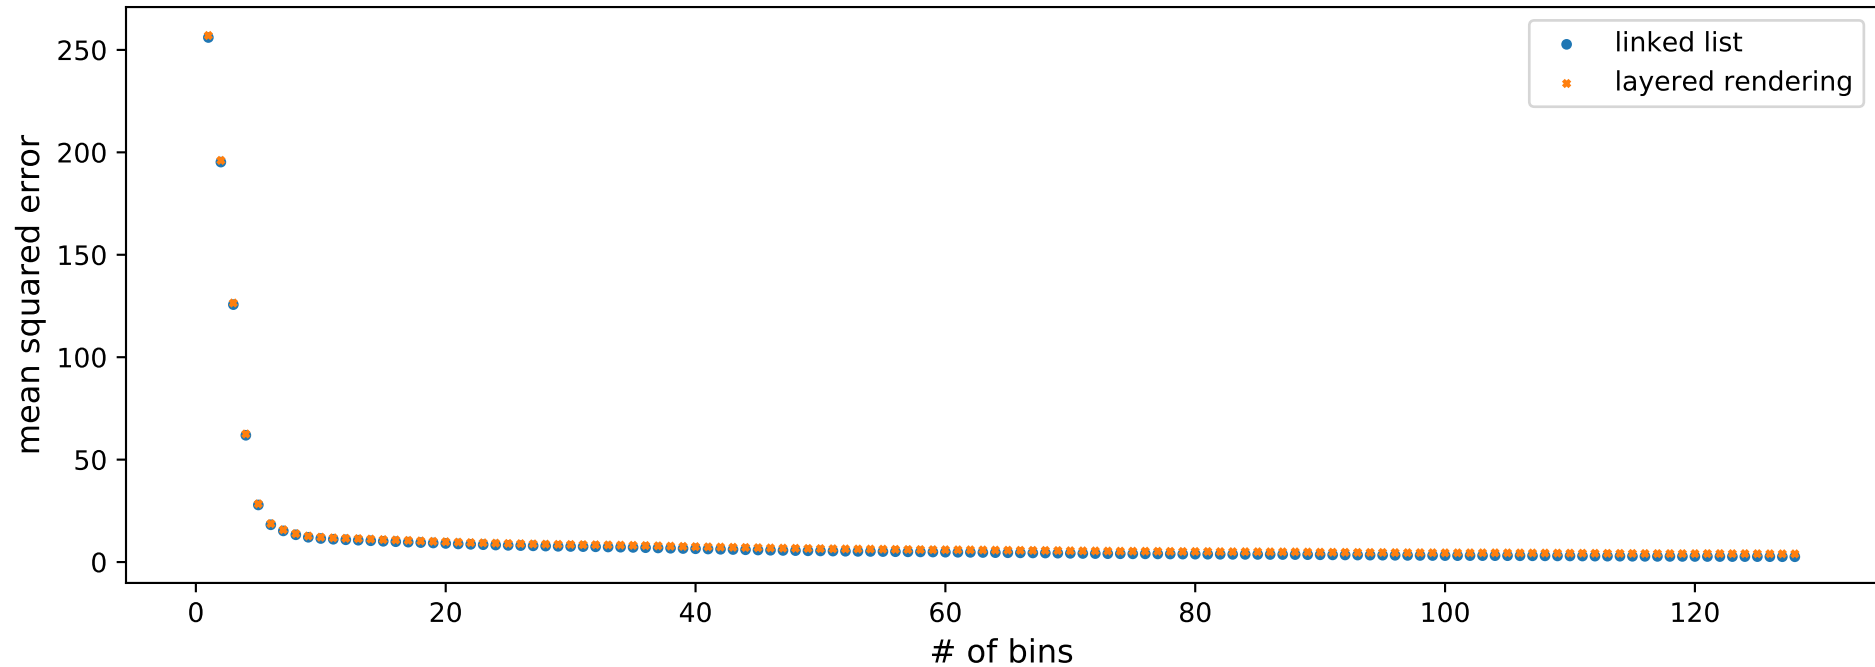

Supplement: supplementary_material [file attachment]

## Scene: squares

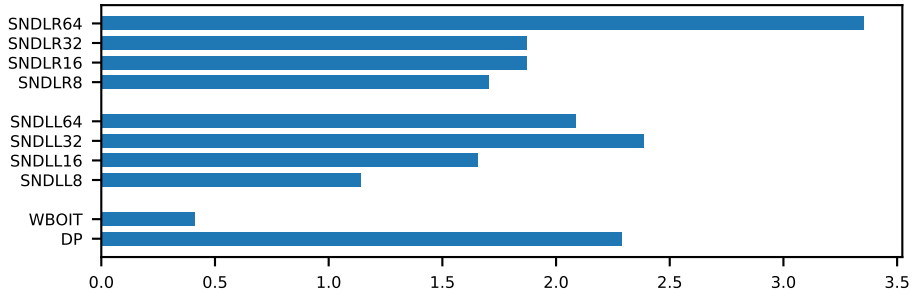

Supplement: supplementary_material [file attachment]

Scene: squares

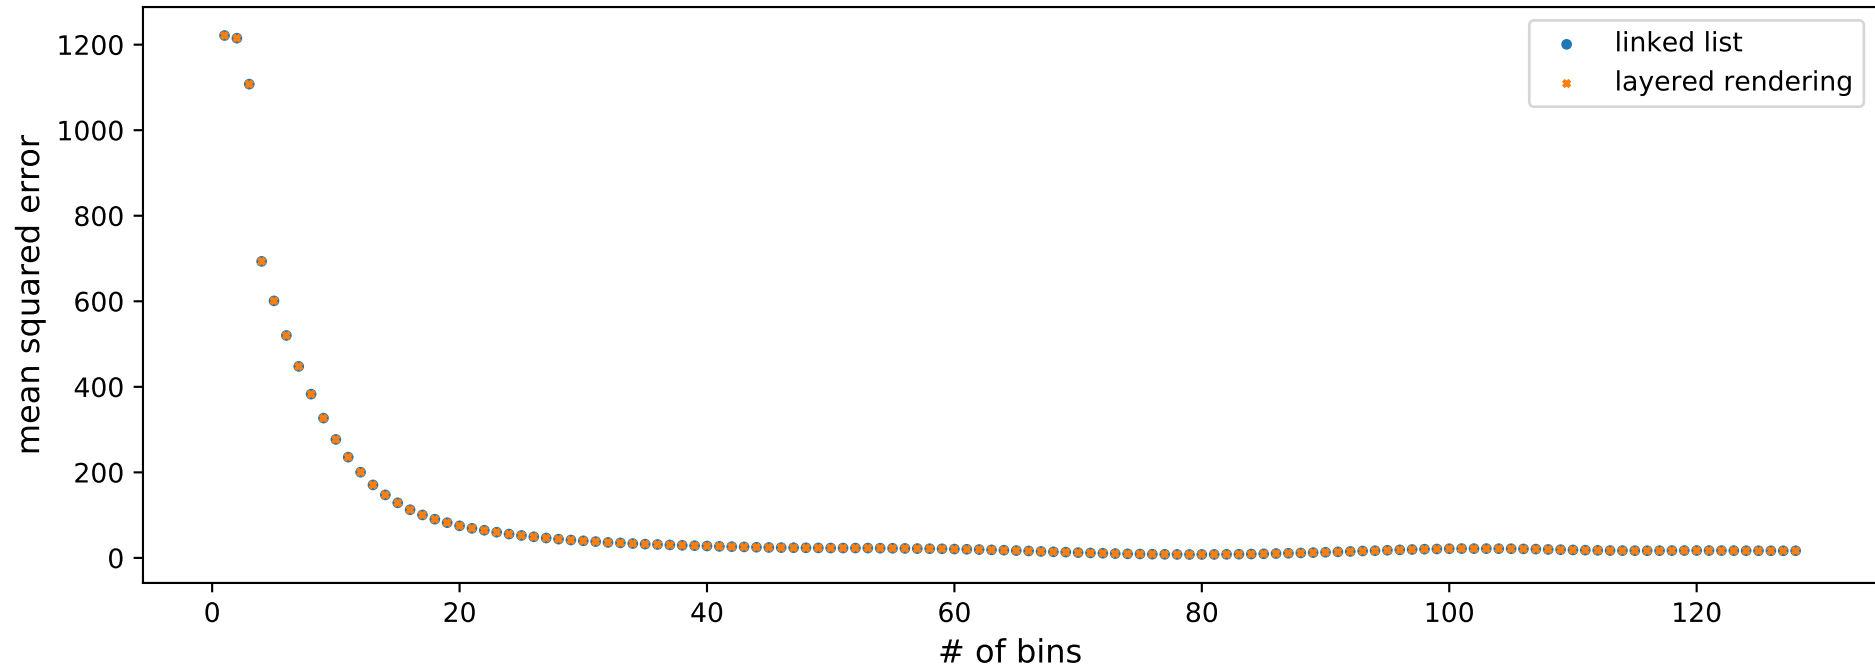

Supplement: supplementary_material [file attachment]

Scene: dragons high poly

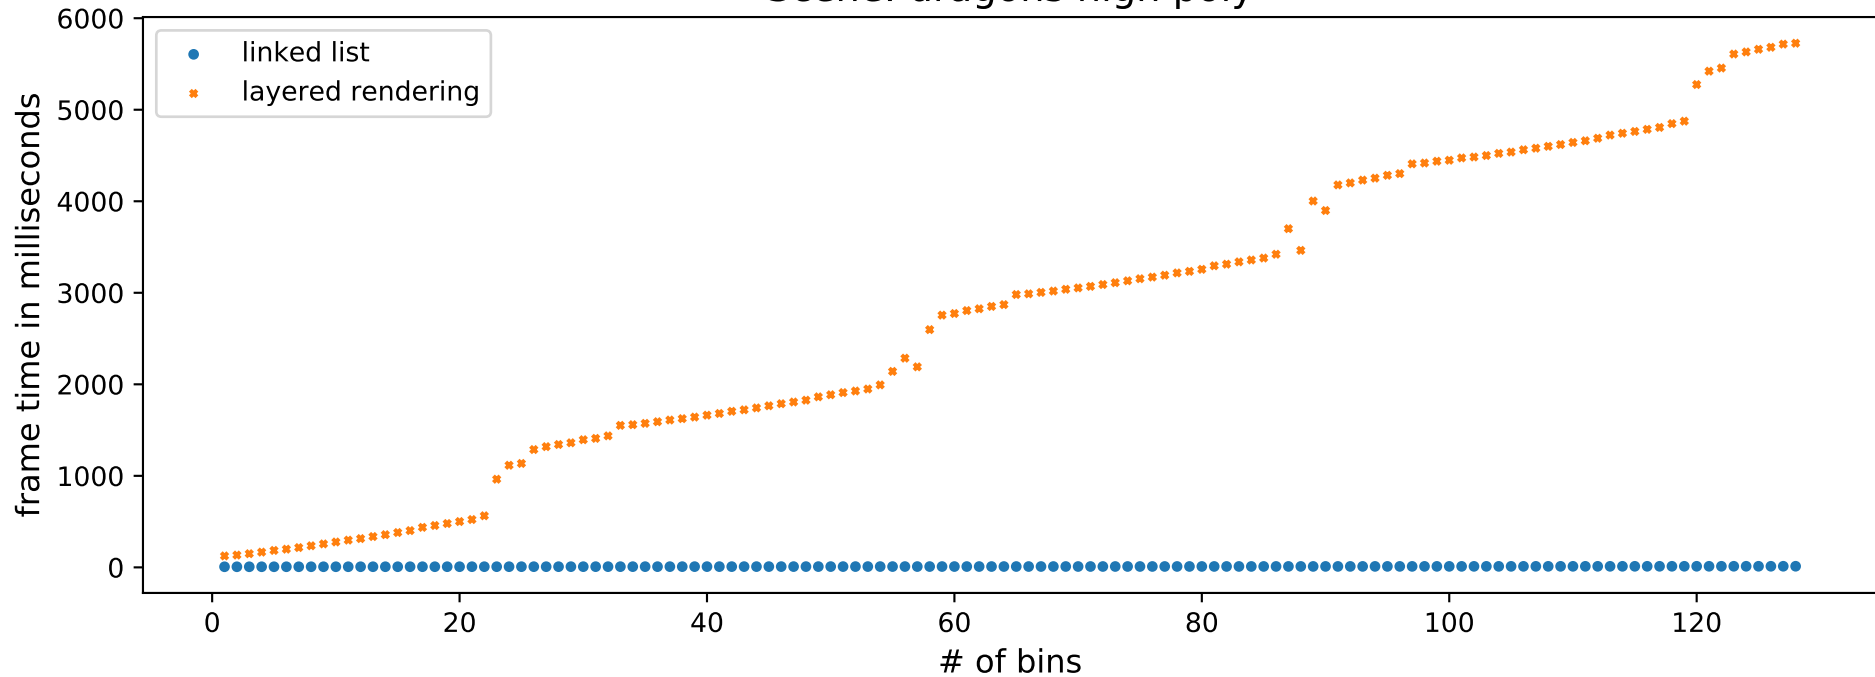

Supplement: supplementary_material [file attachment]

## Scene: power plant

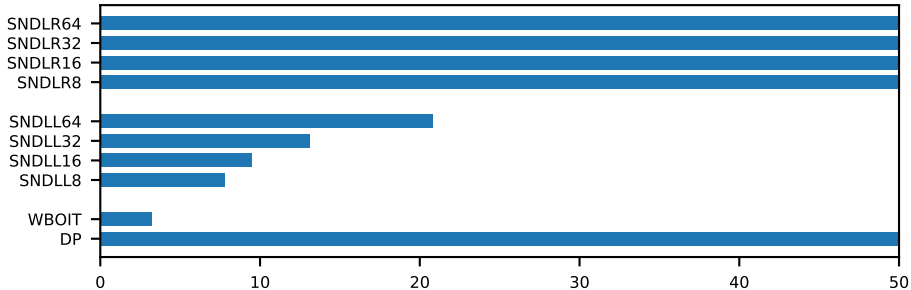

Supplement: supplementary_material [file attachment]

Scene: colored smoke

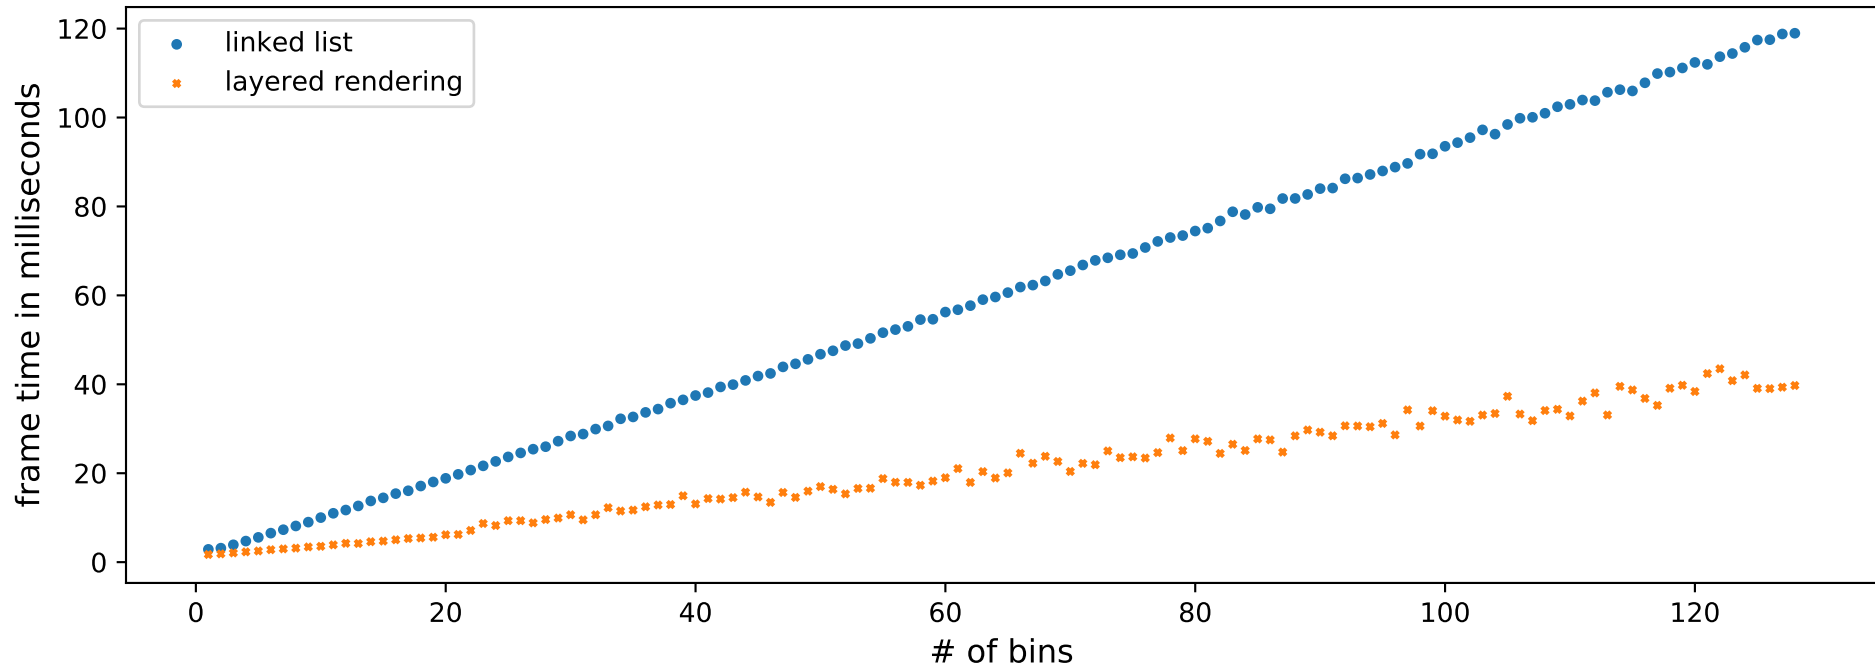

Supplement: supplementary_material [file attachment]

Scene: burning wood

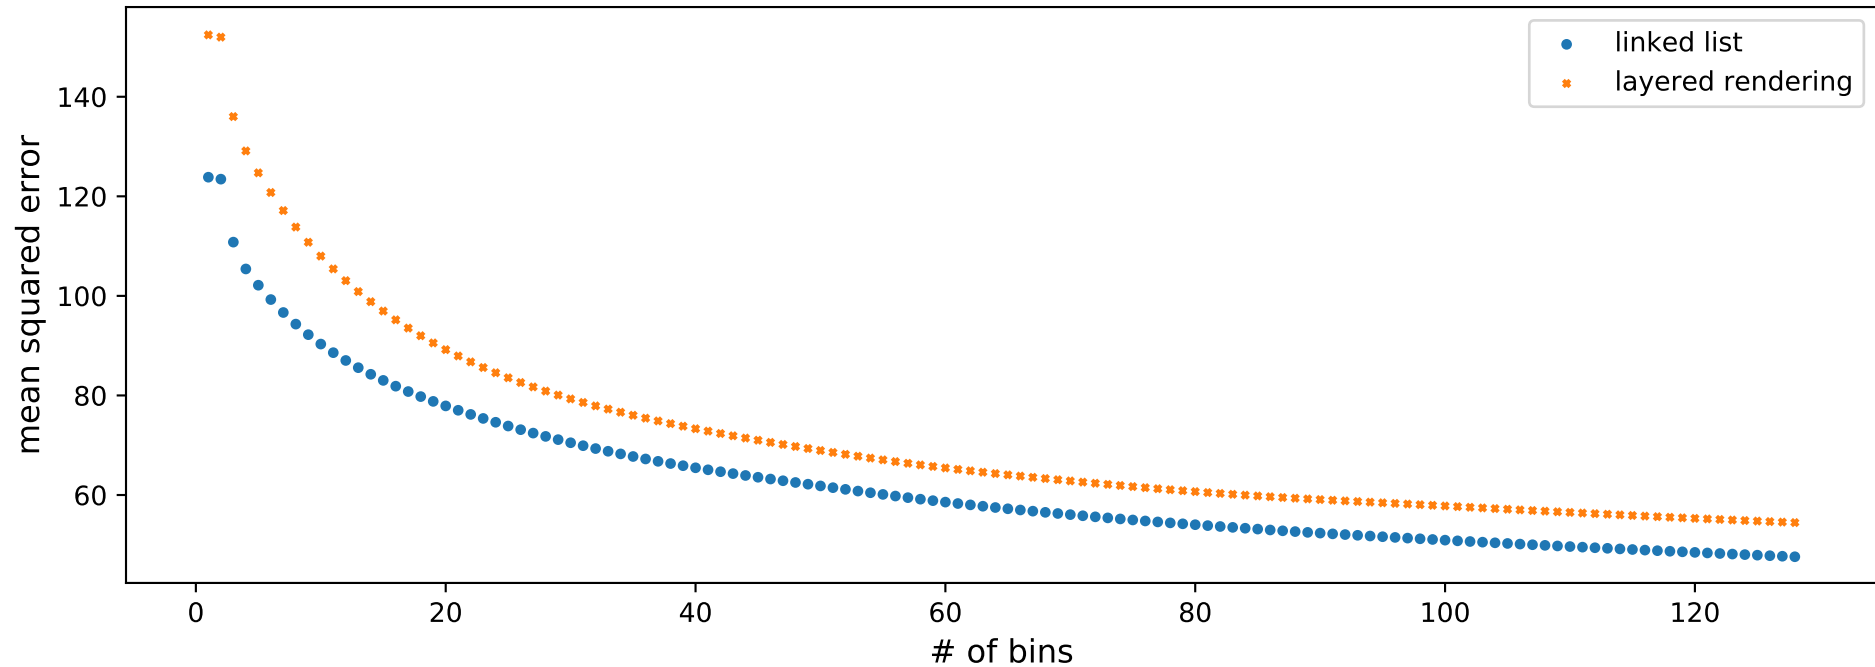

Supplement: supplementary_material [file attachment]

## Scene: engine

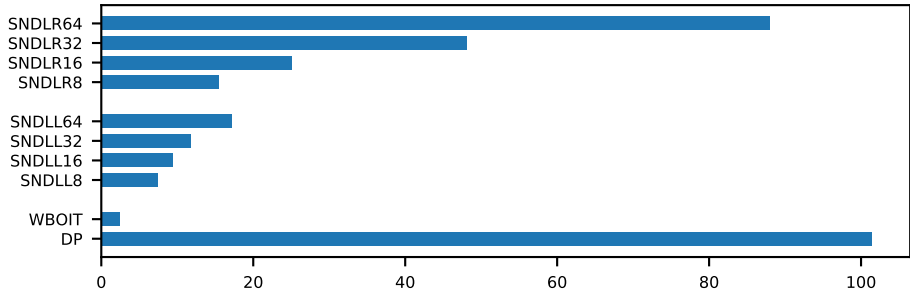

Supplement: supplementary_material [file attachment]

## Scene: grey smoke

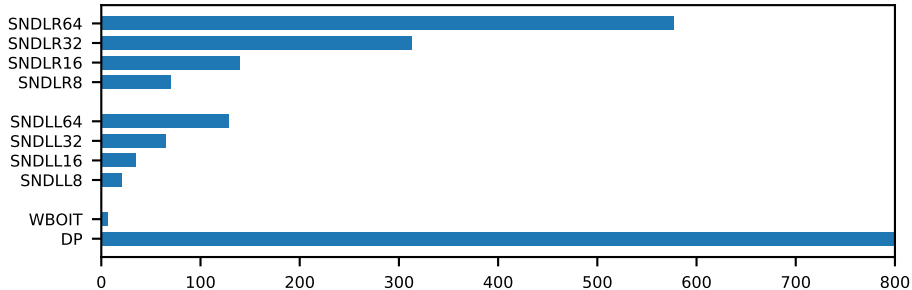

Supplement: supplementary_material [file attachment]

Scene: power plant

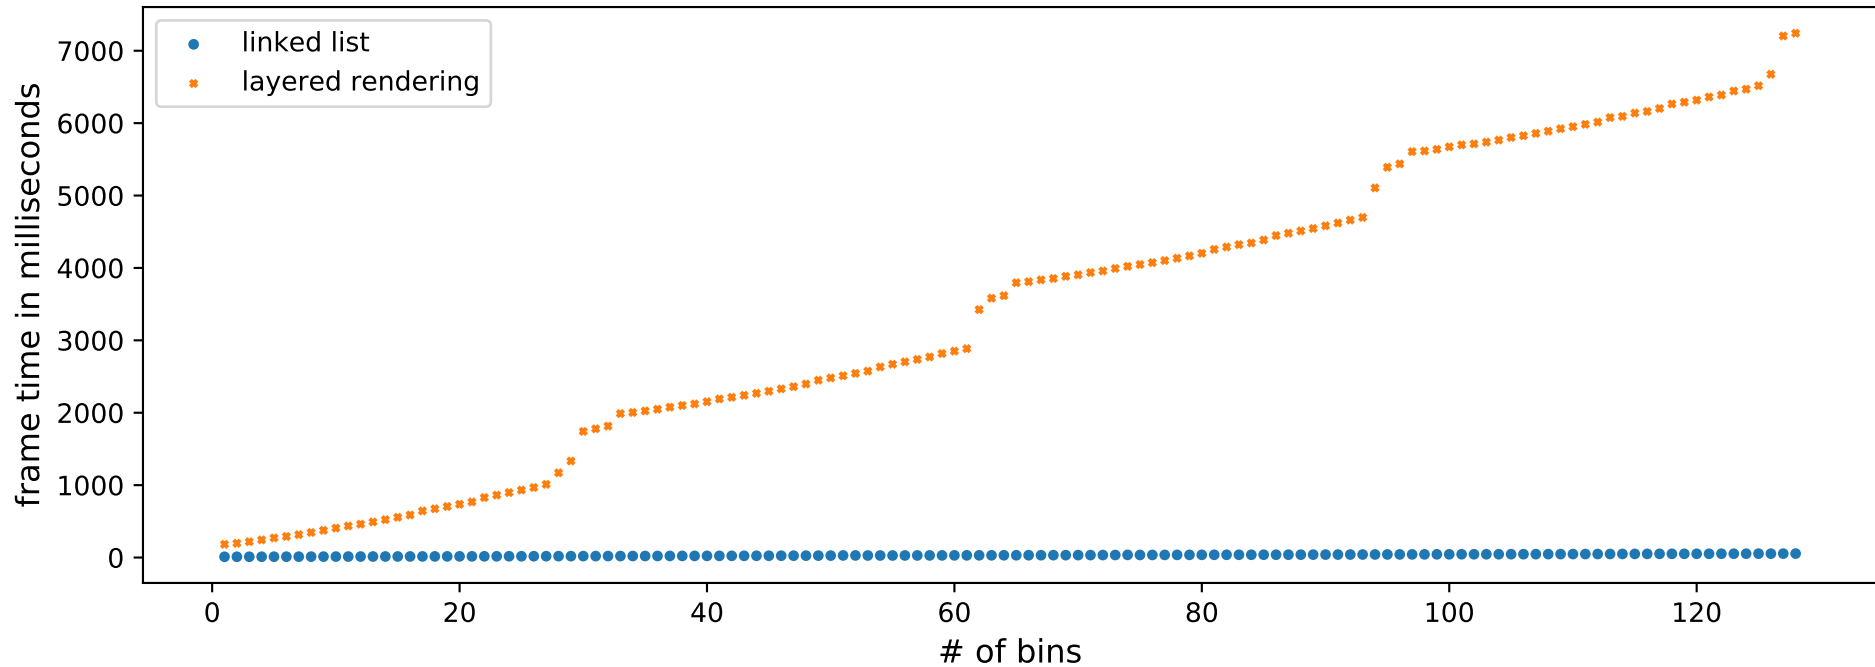

Supplement: supplementary_material [file attachment]

Scene: burning wood

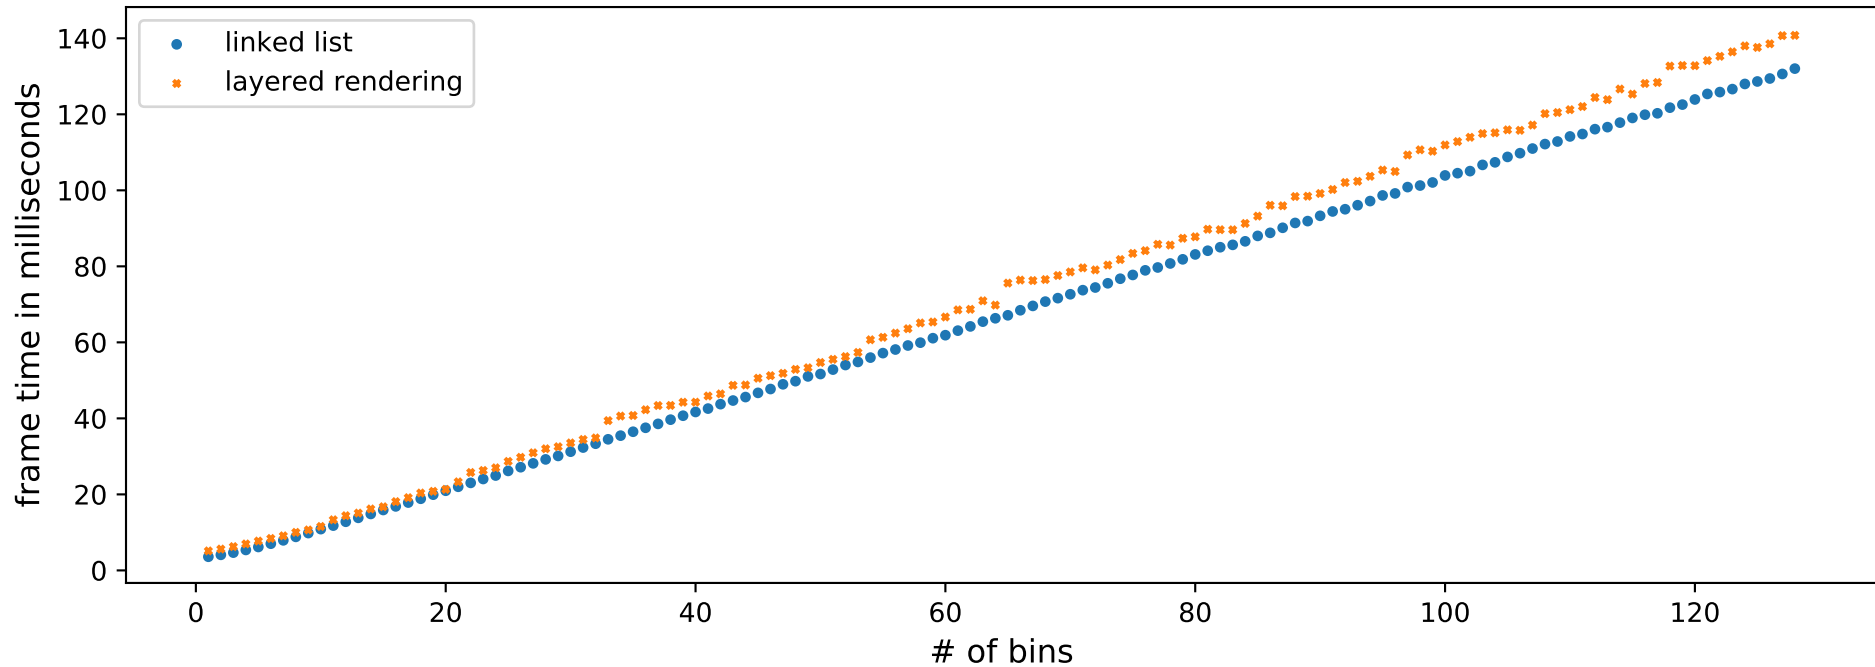

Supplement: supplementary_material [file attachment]

Scene: colored smoke

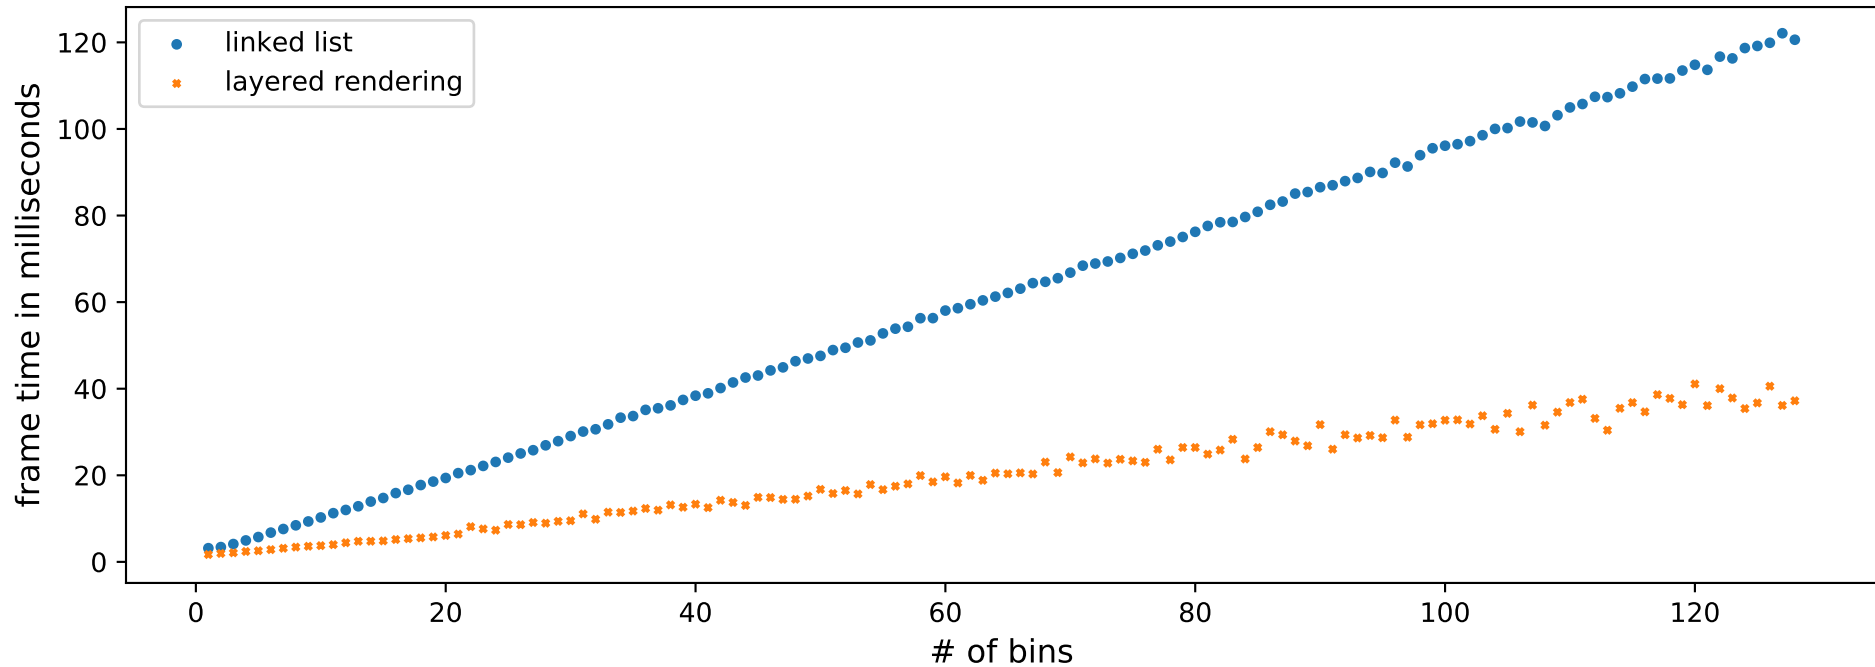

Supplement: supplementary_material [file attachment]

## Scene: power plant

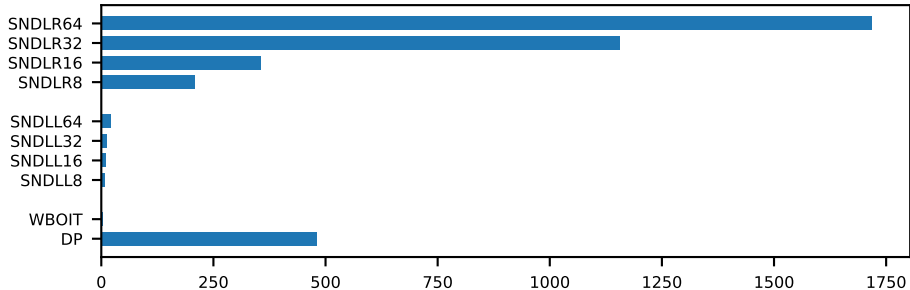

Supplement: supplementary_material [file attachment]

Scene: dragons high poly

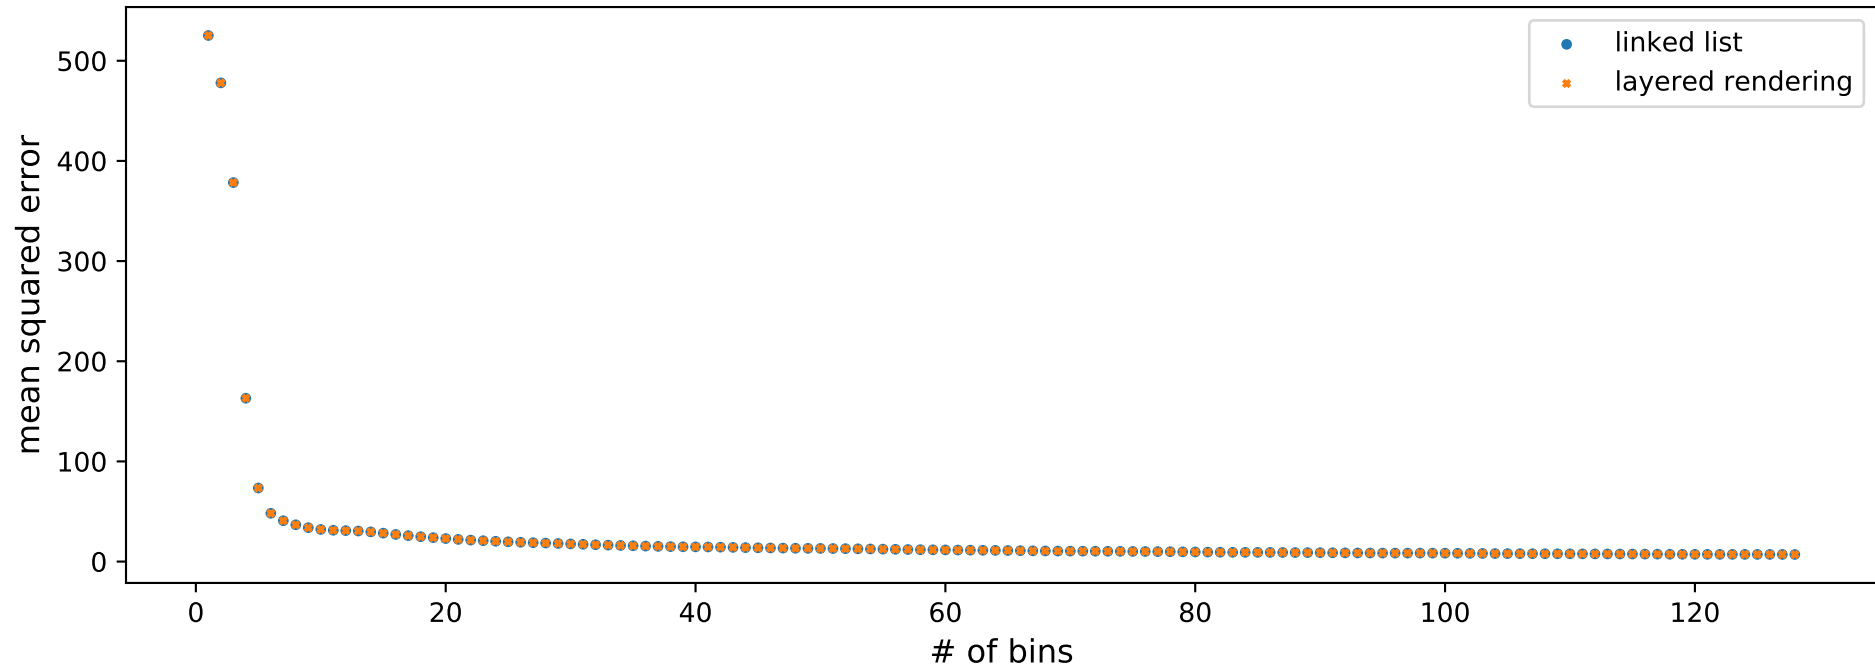

Supplement: supplementary_material [file attachment]

Scene: grey smoke

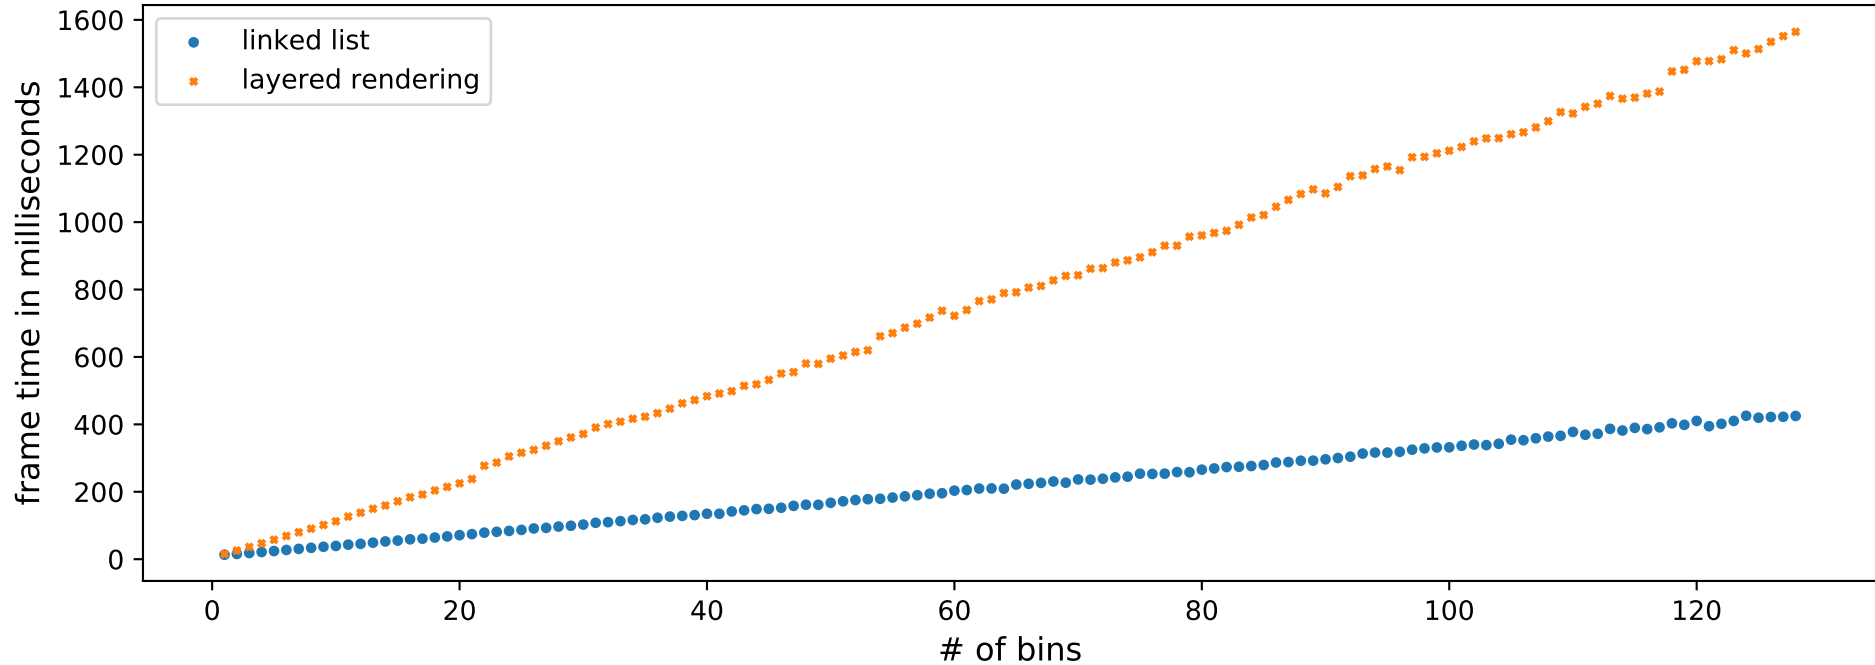

Supplement: supplementary_material [file attachment]

Scene: grey smoke

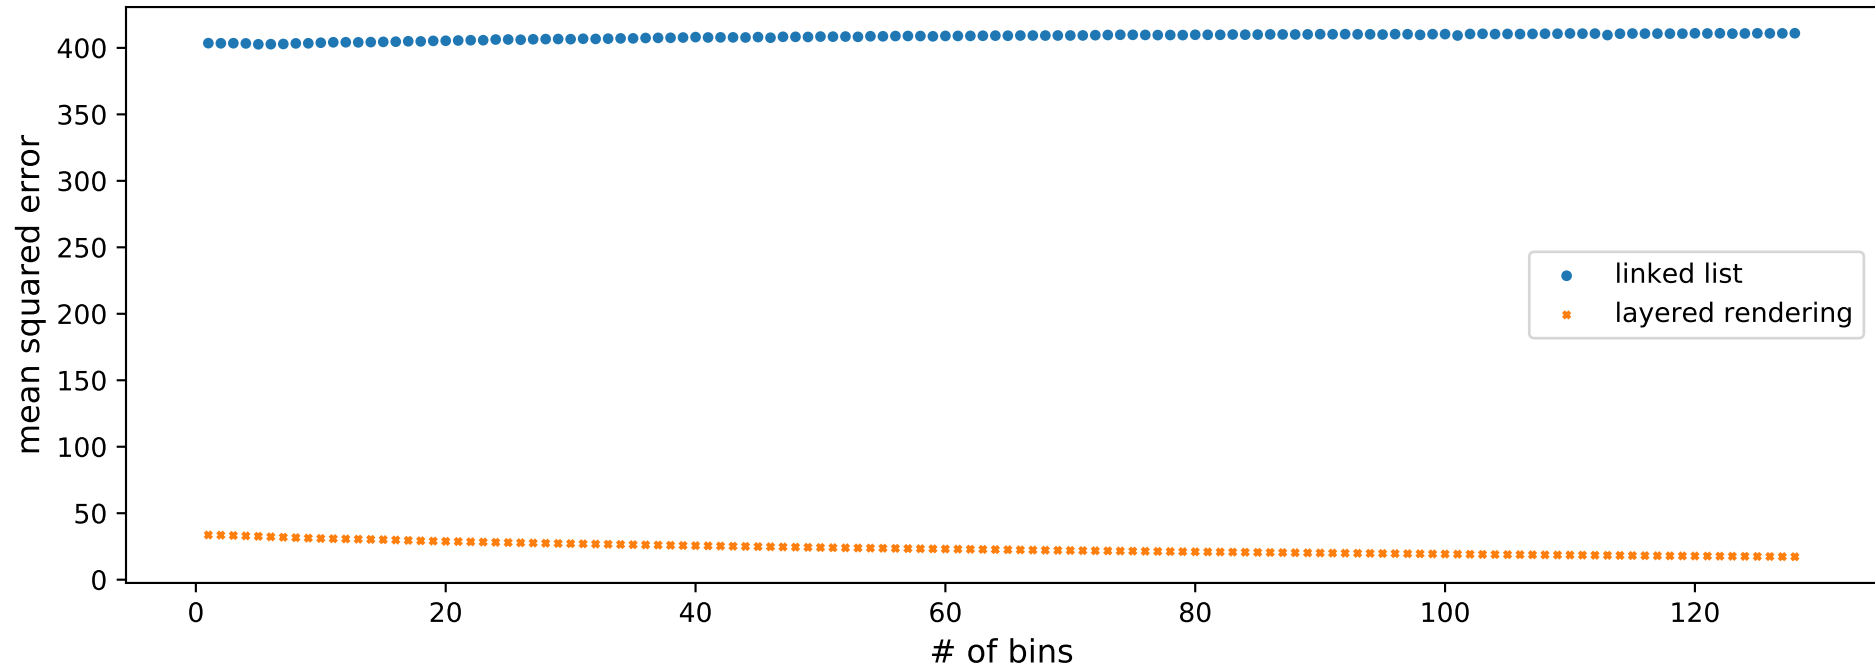

Supplement: supplementary_material [file attachment]

Scene: dragons low poly

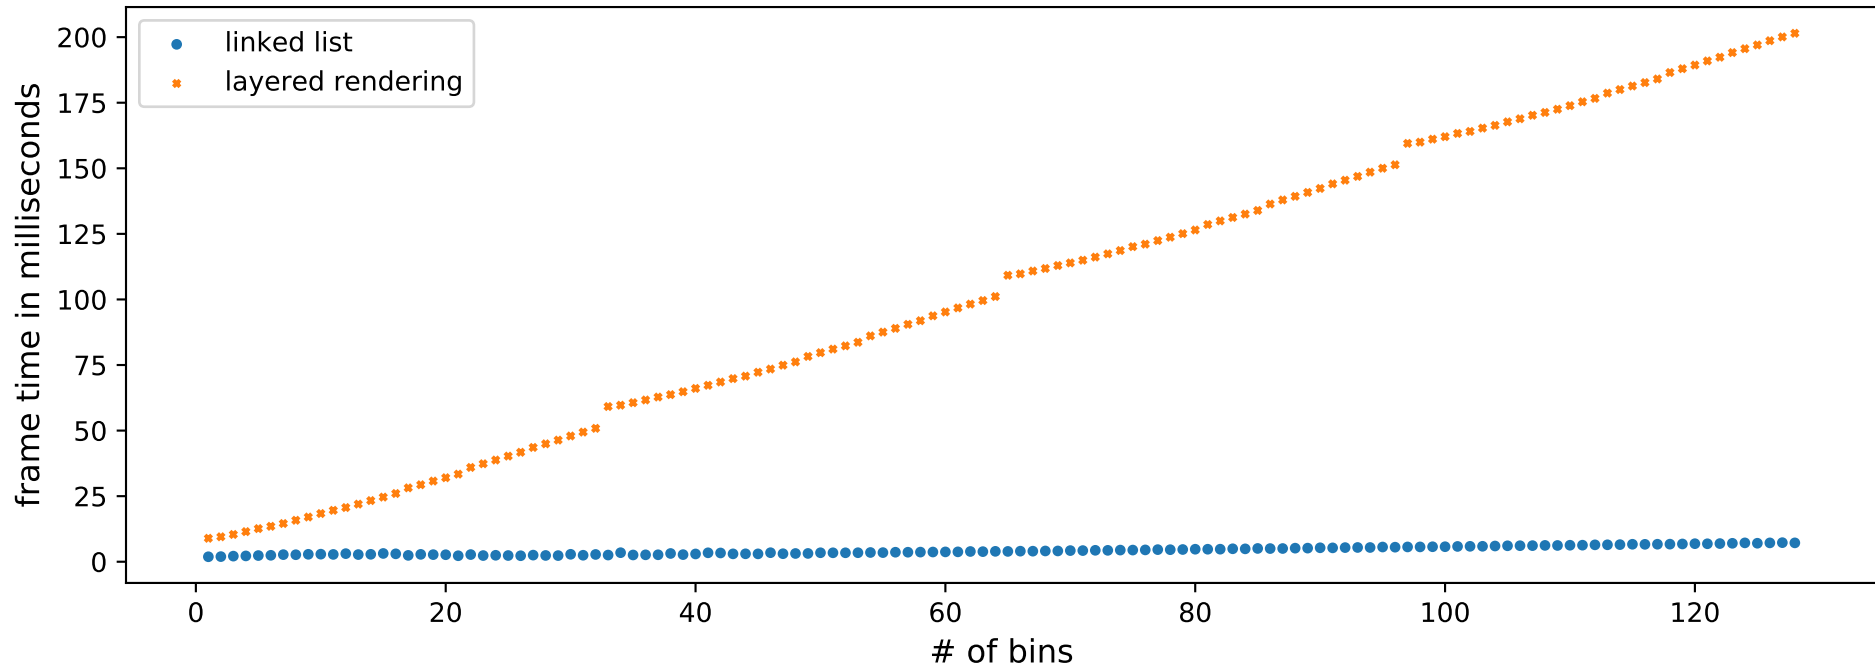

Supplement: supplementary_material [file attachment]

Scene: engine

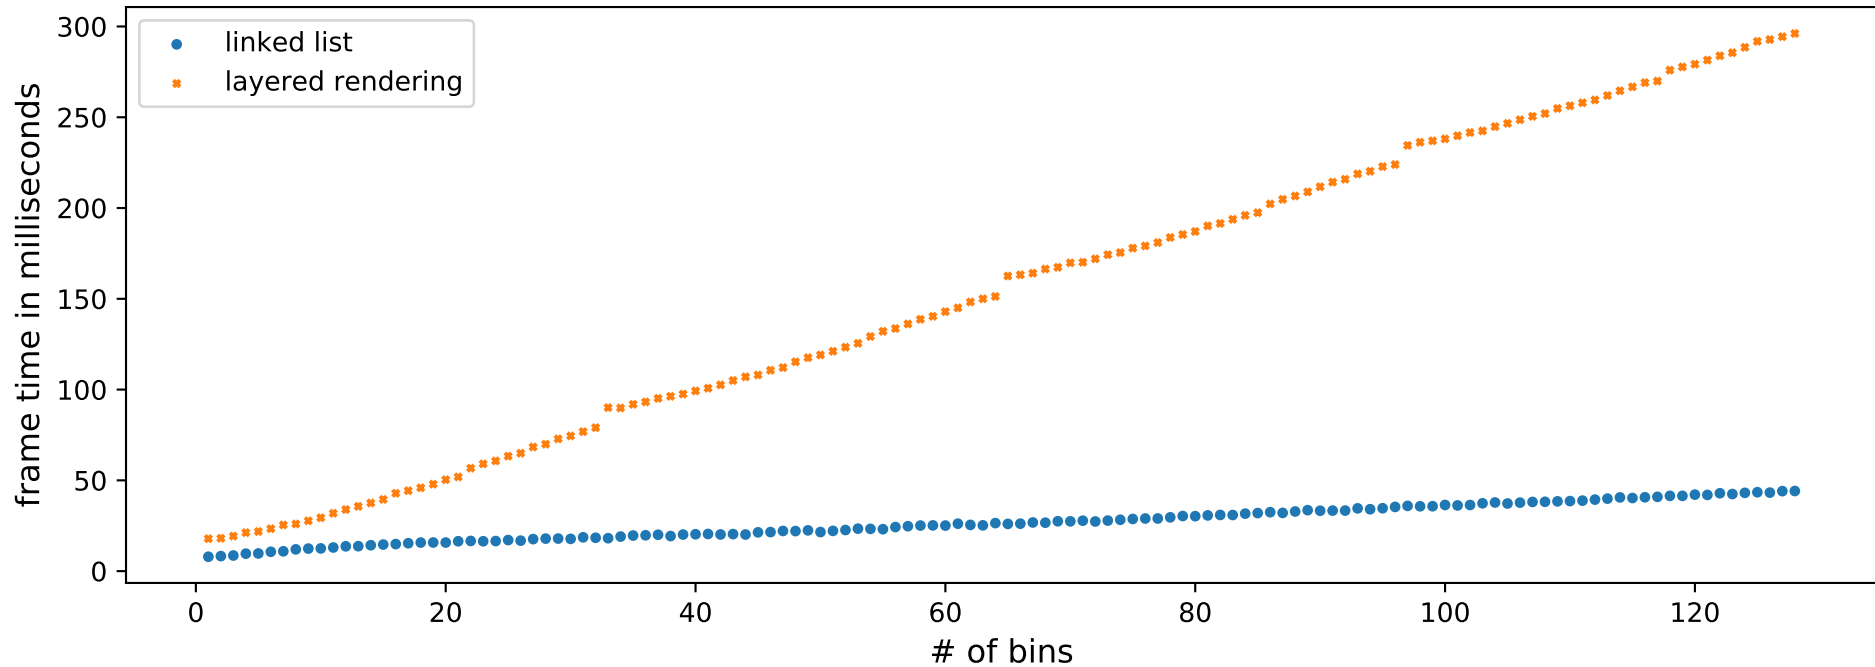

Supplement: supplementary_material [file attachment]

Scene: power plant

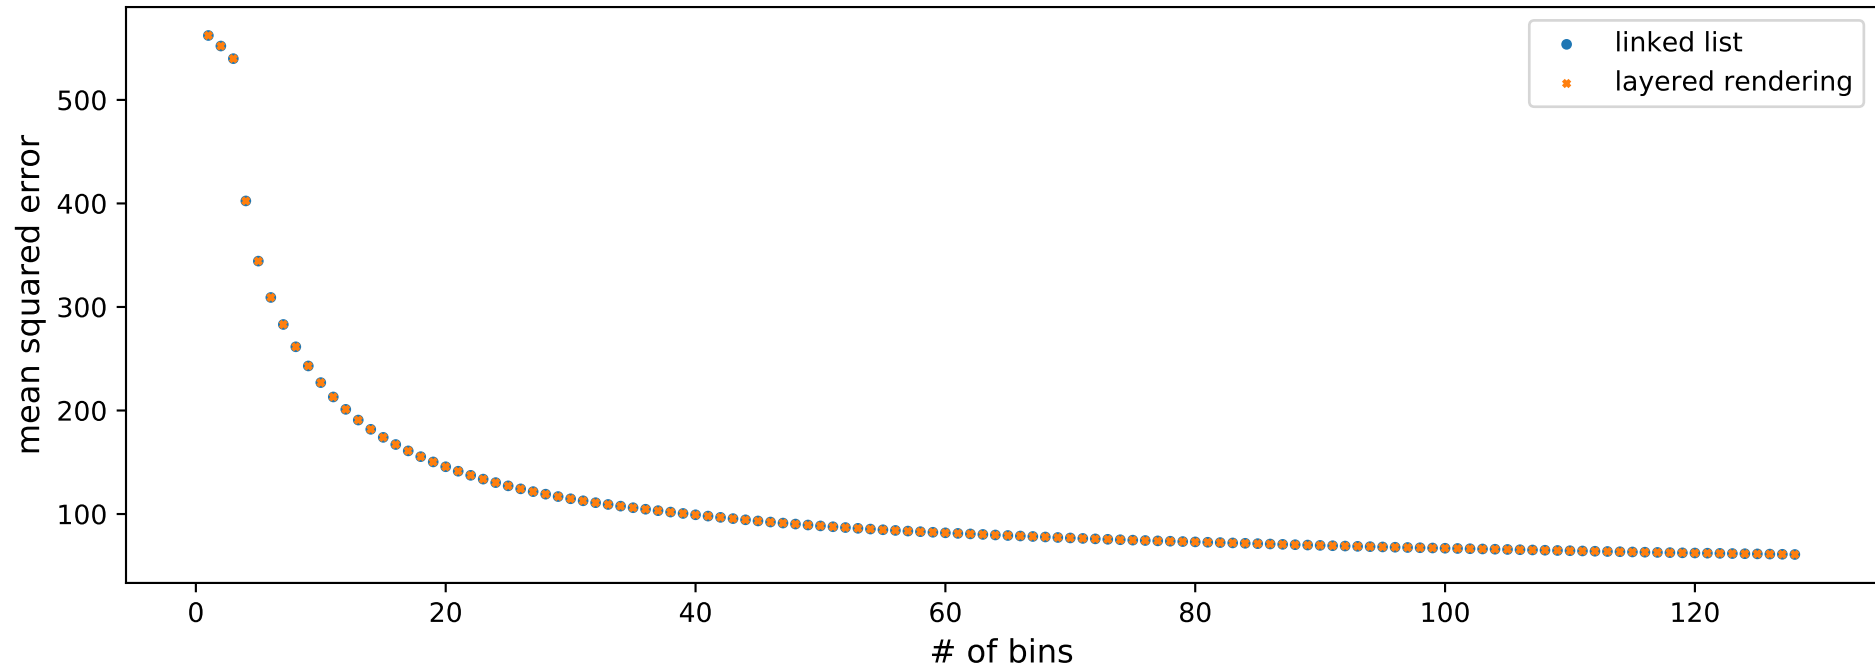

Supplement: supplementary_material [file attachment]

## Scene: colored smoke

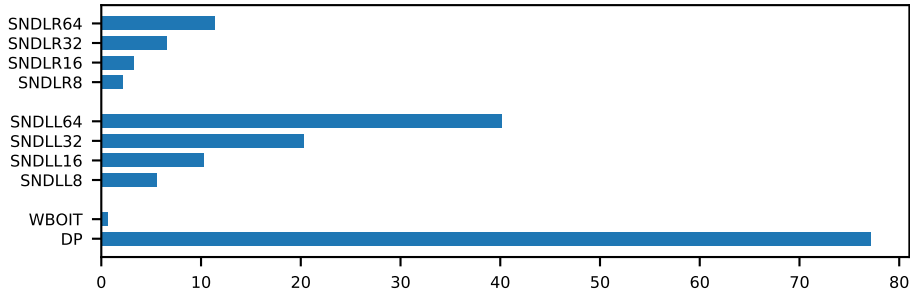

Supplement: supplementary_material [file attachment]

Scene: engine

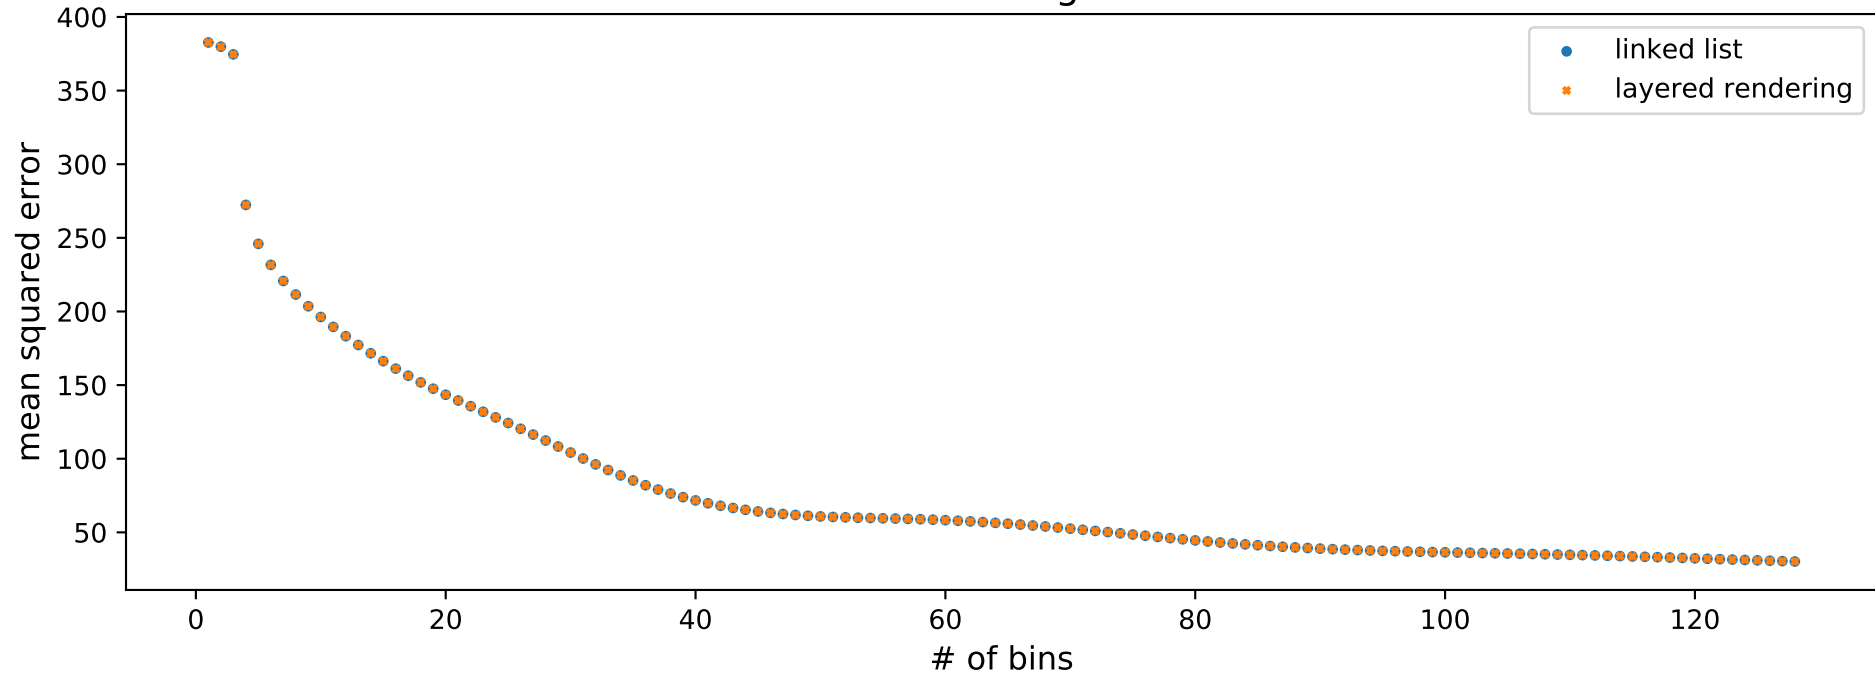

Supplement: supplementary_material [file attachment]

Scene: dragons low poly

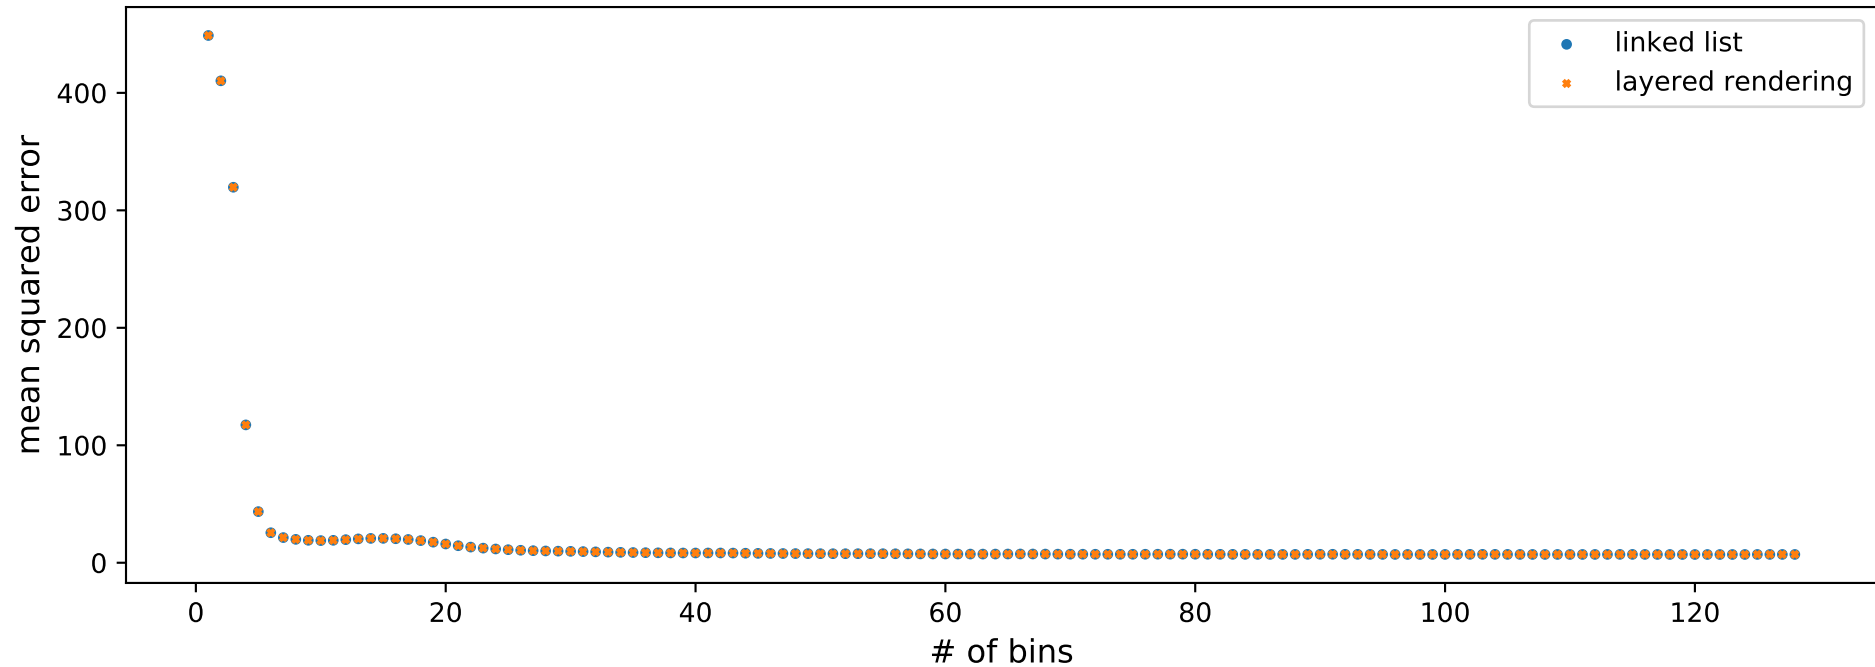

Supplement: supplementary_material [file attachment]

# Scene: dragon high poly

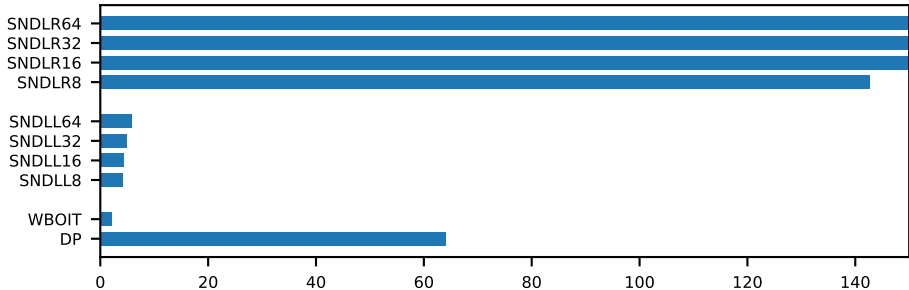

Supplement: supplementary_material [file attachment]

Scene: squares

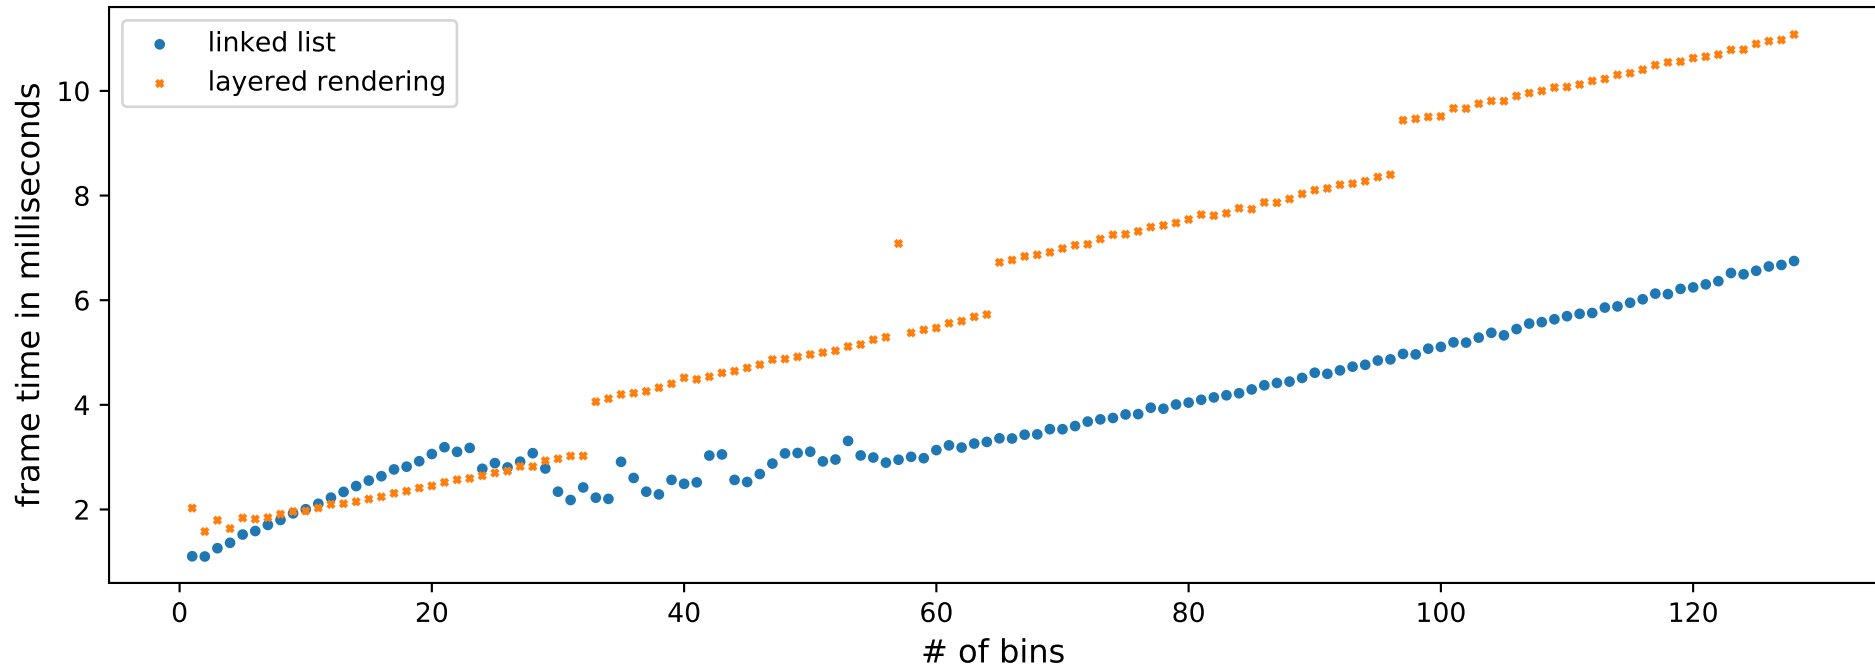

Supplement: supplementary_material [file attachment]
